# Supplementary material
Source: PubMed Central journal article supplement (PMC3945670)
Supplement: NIHMS527431-supplement-10544_2013_9808_MOESM2_ESM.pdf [file NIHMS527431-supplement-10544_2013_9808_MOESM2_ESM.pdf]

Stern – Volmer relationship for fluorescence quenching by oxygen

$$I_x = \frac{I_o}{1 + K_{sv} * [O_2]}$$

$I_o$  – initial fluorescent intensity

$I_x$  – observed fluorescent intensity

$K_{sv}$  - Stern-Volmer coefficient

[...] - concentration

Diffusion is modeled by Fick's 2<sup>nd</sup> Law

$$\frac{\partial C(x, t)}{\partial t} = D \times \frac{\partial^2 C(x, t)}{\partial x^2}$$

Boundary Conditions

$$C(x, 0) = 0; \quad C(0, t) = C_s; \quad C(\infty, t) = 0$$

Solution based on boundary conditions:

$$C(x, t) = C_s \times \text{Erfc}\left[\frac{x}{2\sqrt{D \times t}}\right]$$

$D$  – diffusivity;

$x$  – PDMS thickness;

$t$  – time (sec)

Combining Stern Volmer & Fick's 2<sup>nd</sup> Law

$$I_x = \frac{I_o}{K_{sv} \times C_s \times \text{Erfc}\left[\frac{x}{2\sqrt{D \times t}}\right] + 1}$$
