# Supplementary material
Source: PubMed Central journal article supplement (PMC3945670)

Supplemental Figure S1.

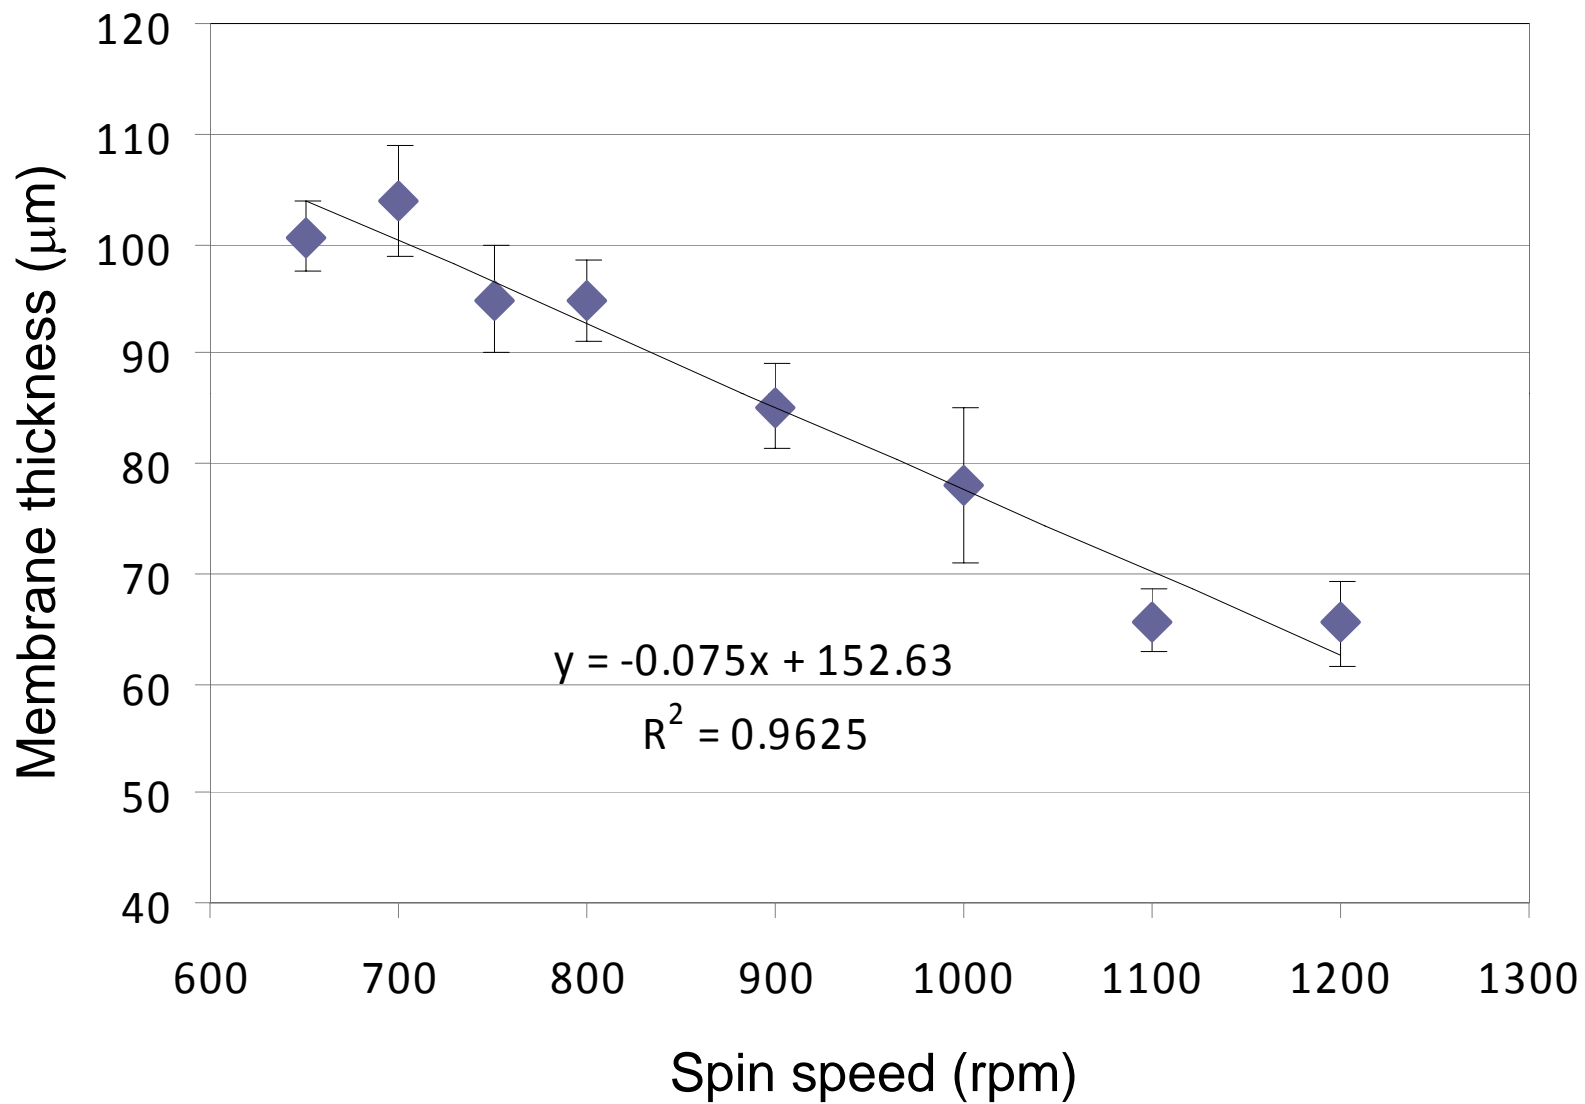

Supplement: NIHMS527431-supplement-10544_2013_9808_MOESM1_ESM.pdf [file NIHMS527431-supplement-10544_2013_9808_MOESM1_ESM.pdf]

Supplemental Figure S3.

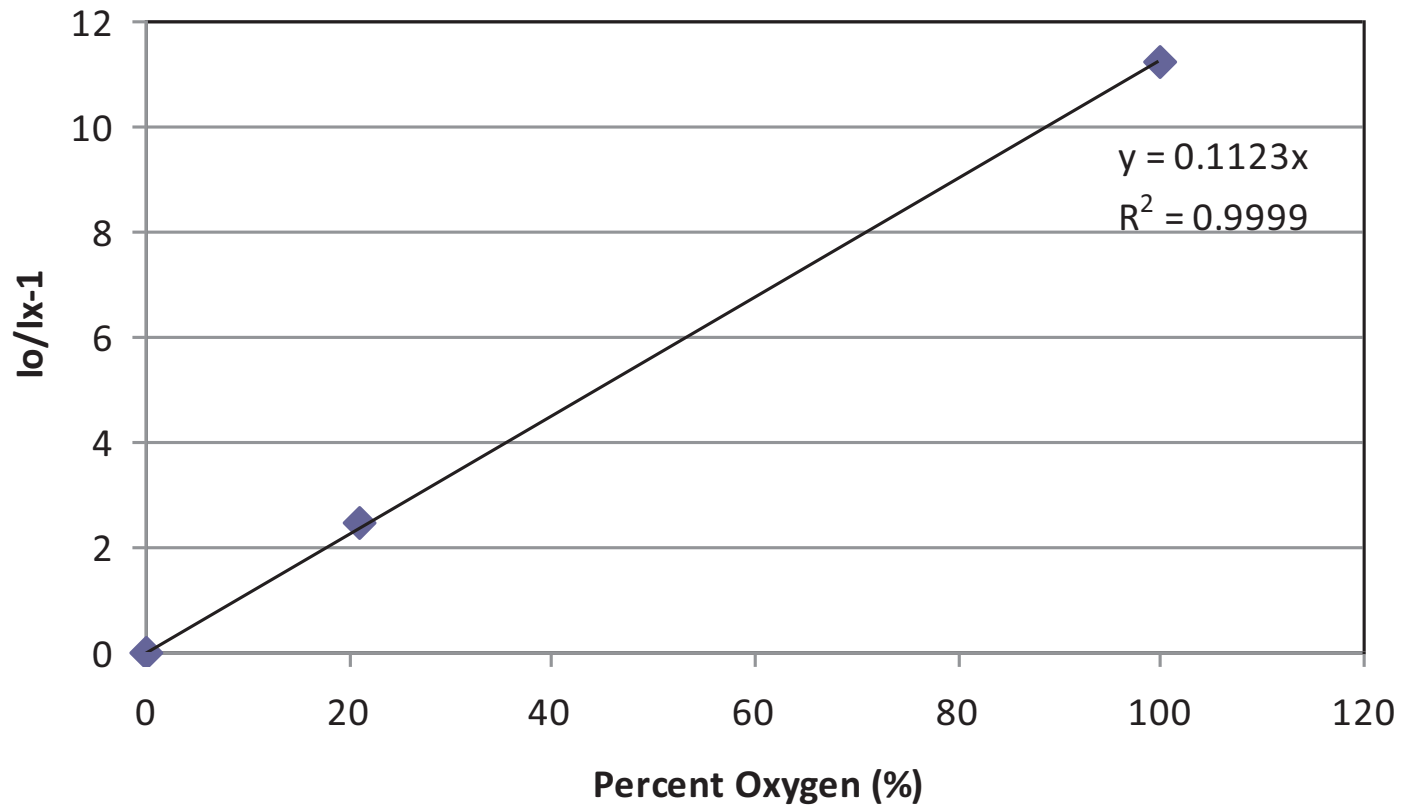

Supplement: NIHMS527431-supplement-10544_2013_9808_MOESM3_ESM.pdf [file NIHMS527431-supplement-10544_2013_9808_MOESM3_ESM.pdf]

Supplemental Figure S4.

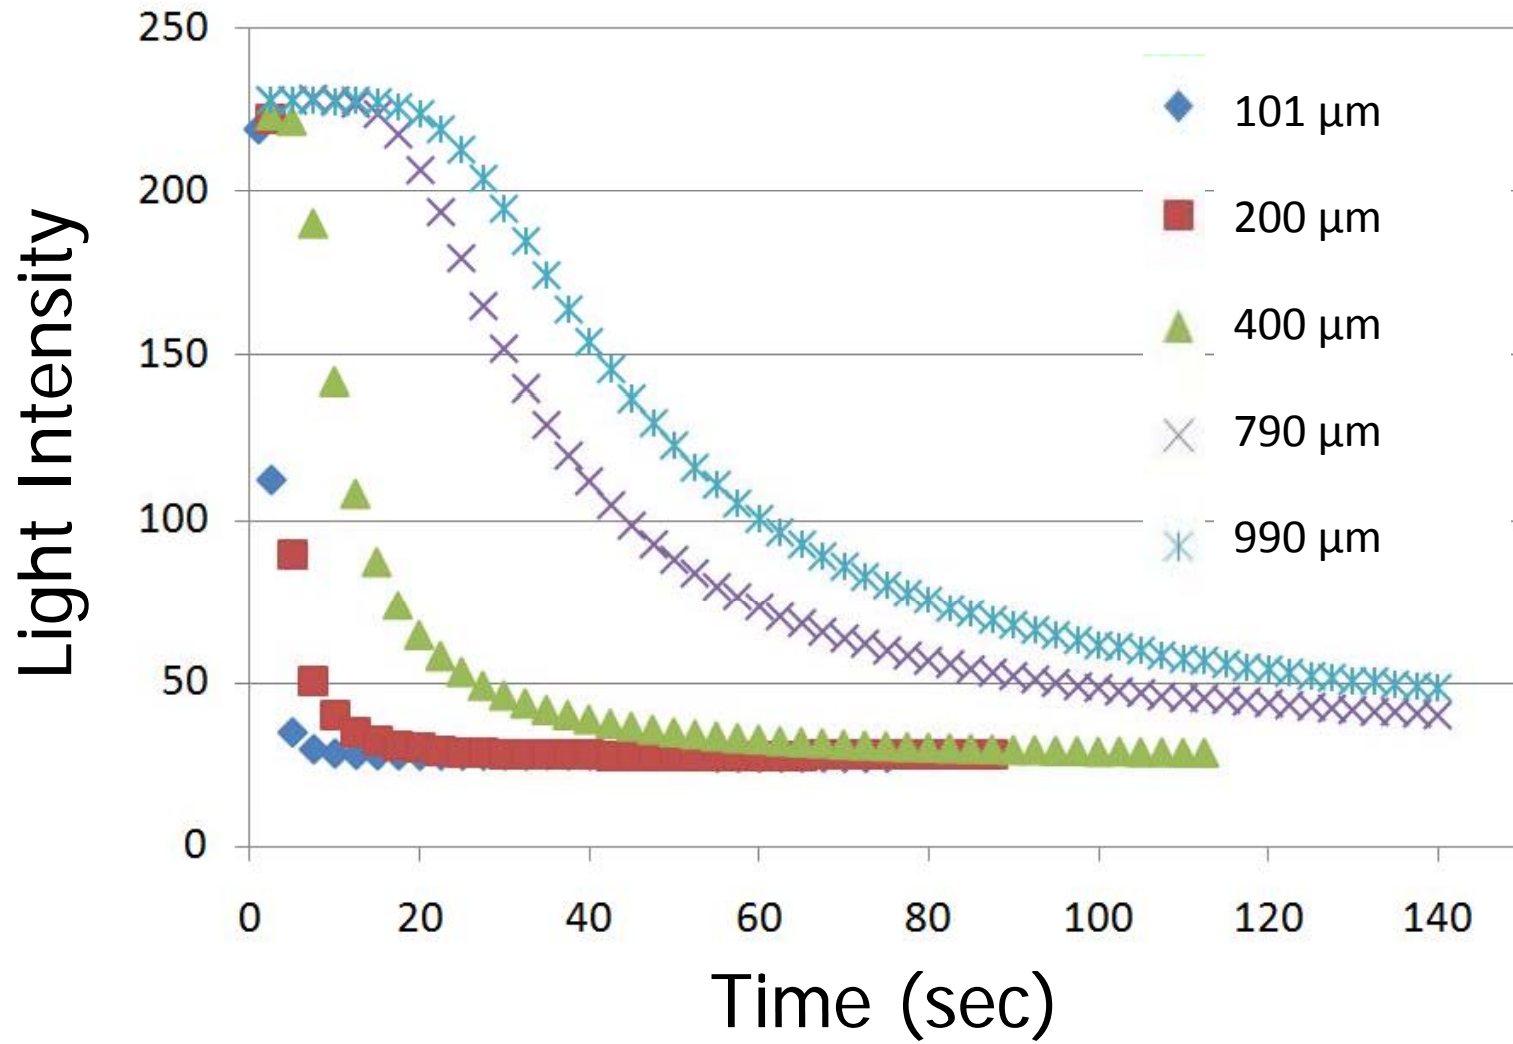

Supplement: NIHMS527431-supplement-10544_2013_9808_MOESM4_ESM.pdf [file NIHMS527431-supplement-10544_2013_9808_MOESM4_ESM.pdf]

Supplemental Figure S5

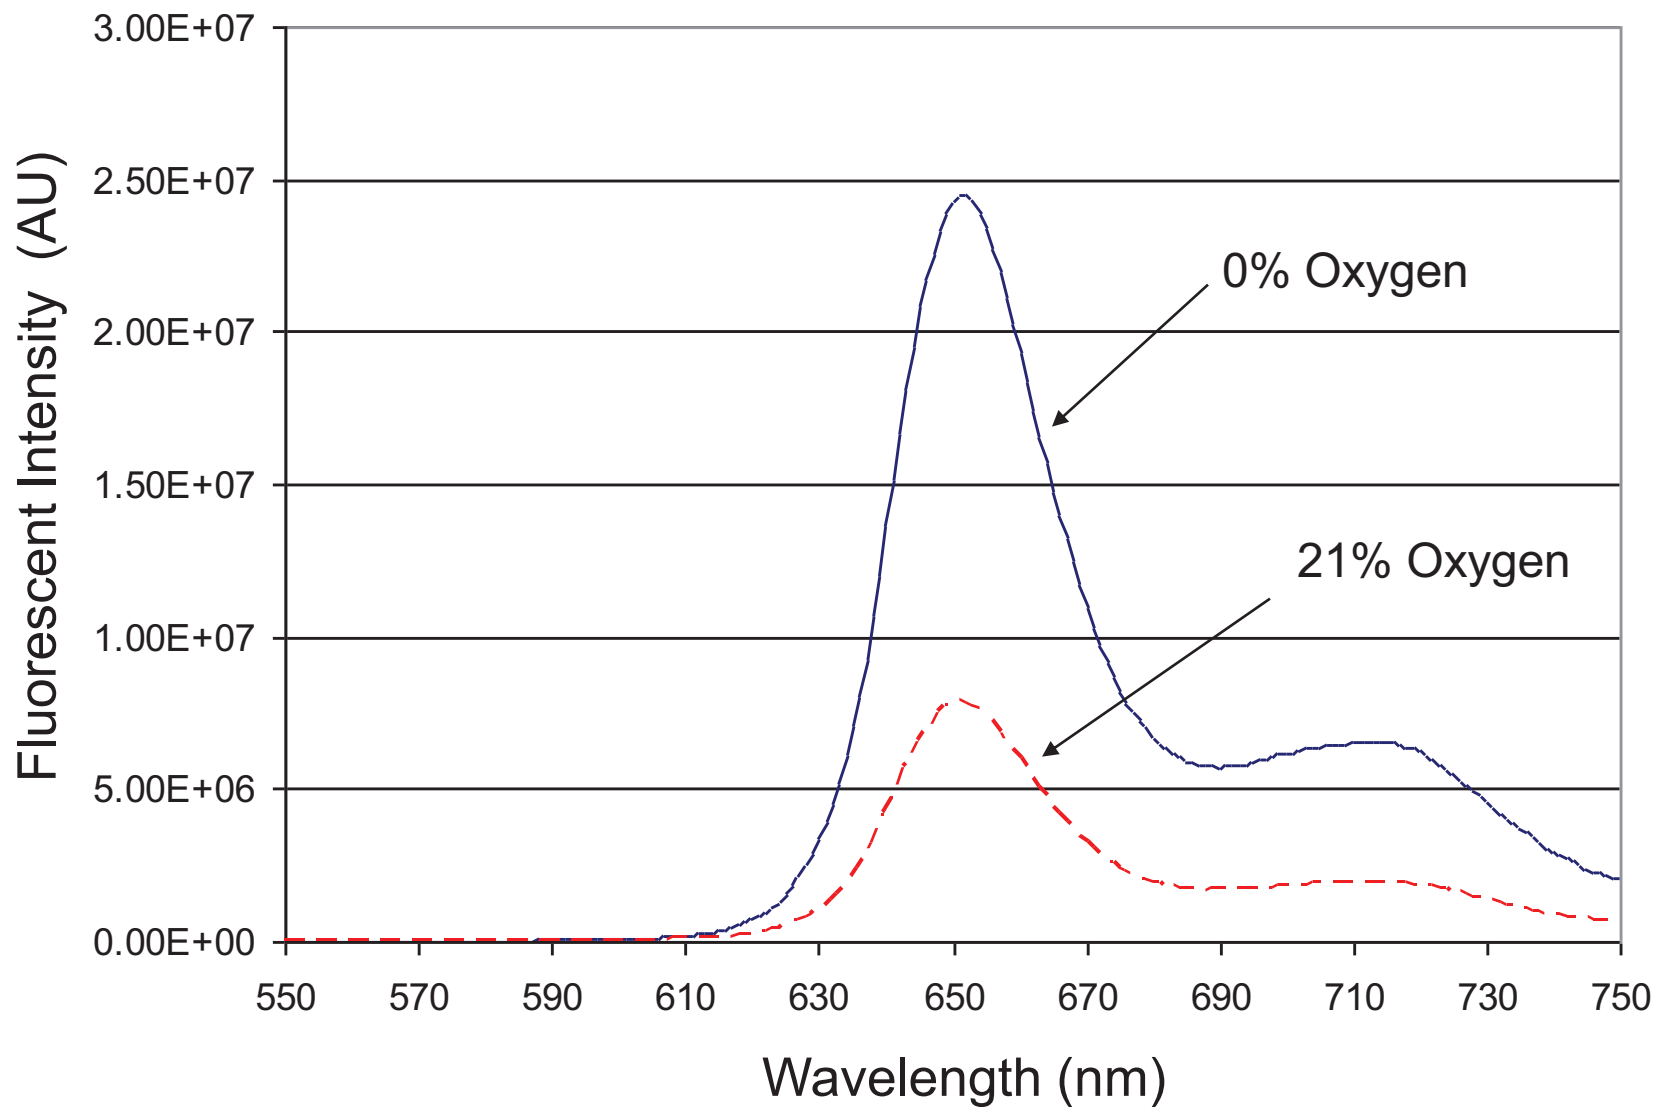

Supplement: NIHMS527431-supplement-10544_2013_9808_MOESM5_ESM.pdf [file NIHMS527431-supplement-10544_2013_9808_MOESM5_ESM.pdf]
